# Supplementary material
Source: publisher figshare collection journal article supplement (https://acs.figshare.com/ndownloader/files/4169245)
Supplement: Supplementary file 1 [file 4169245]

# **Exciton Band Structure in Bacterial Peripheral Light-Harvesting Complexes**

## **(Supporting Information)**

Gediminas Trinkunas,<sup>†,‡</sup> Oksana Zerlauskiene,<sup>†</sup> Vidita Urbonienė,<sup>§</sup> Jevgenij Chmeliov,<sup>†,‡</sup>  
Andrew Gall,<sup>¶</sup> Bruno Robert,<sup>¶</sup> Leonas Valkunas<sup>\*,†,‡</sup>

<sup>†</sup> Institute of Physics, Center for Physical Sciences and Technology, Savanoriu Ave. 231,  
LT-02300 Vilnius, Lithuania

<sup>‡</sup> Department of Theoretical Physics, Faculty of Physics, Vilnius University,  
Sauletekio Ave. 9, LT-10222 Vilnius, Lithuania

<sup>§</sup> Department of General Physics and Spectroscopy, Faculty of Physics, Vilnius University,  
Sauletekio Ave. 9, LT-10222 Vilnius, Lithuania

<sup>¶</sup> Institute of Biology and Technology of Saclay, CNRS-URA2096, CEA-Saclay,  
91191 Gif sur Yvette, France

\* Corresponding author: leonas.valkunas@ff.vu.lt

Explicit content of the self-modeling curve resolution procedure applied to the data array of the LH2 absorption spectra of *Rba. shpaeroides* and *Rbl. acidophilus* bacterial species measured at 16 and 18 temperatures, respectively, in the range of 4 to 300 K is shown in Figs. S1 and S2.

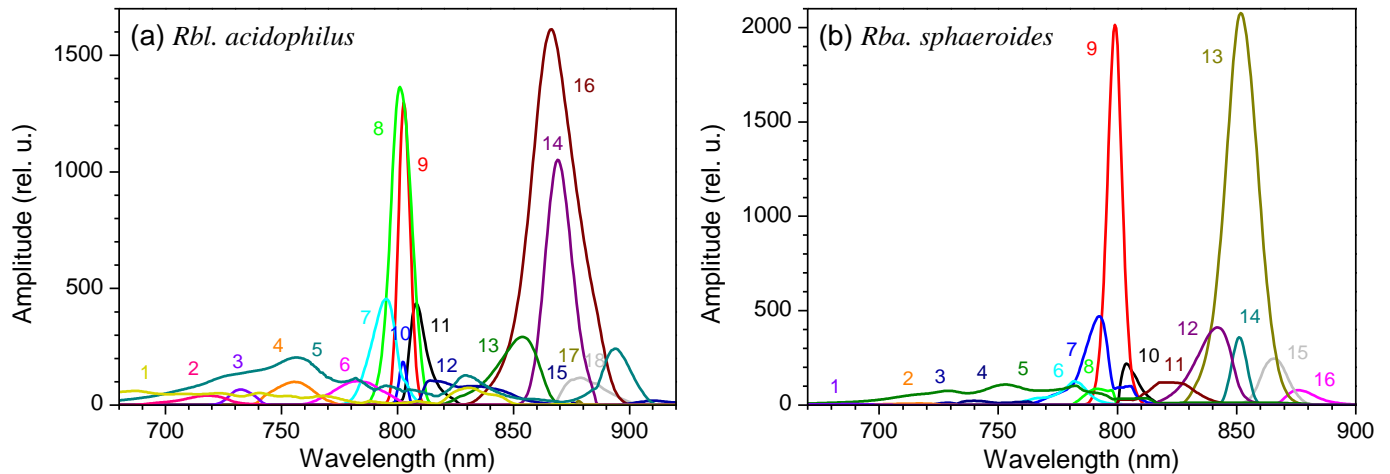

**Fig. S1.** Graphical representation of the **S** matrix columns. (a)  $p$  ( $p = 18$ ) “pure” spectral components ( $m = 641$  wavelength points) of LH2 absorption spectrum for *Rbl. acidophila*. (b)  $p$  ( $p = 16$ ) “pure” spectral components ( $m = 641$  wavelength points) of LH2 absorption spectrum for *Rba. Sphaeroides*.

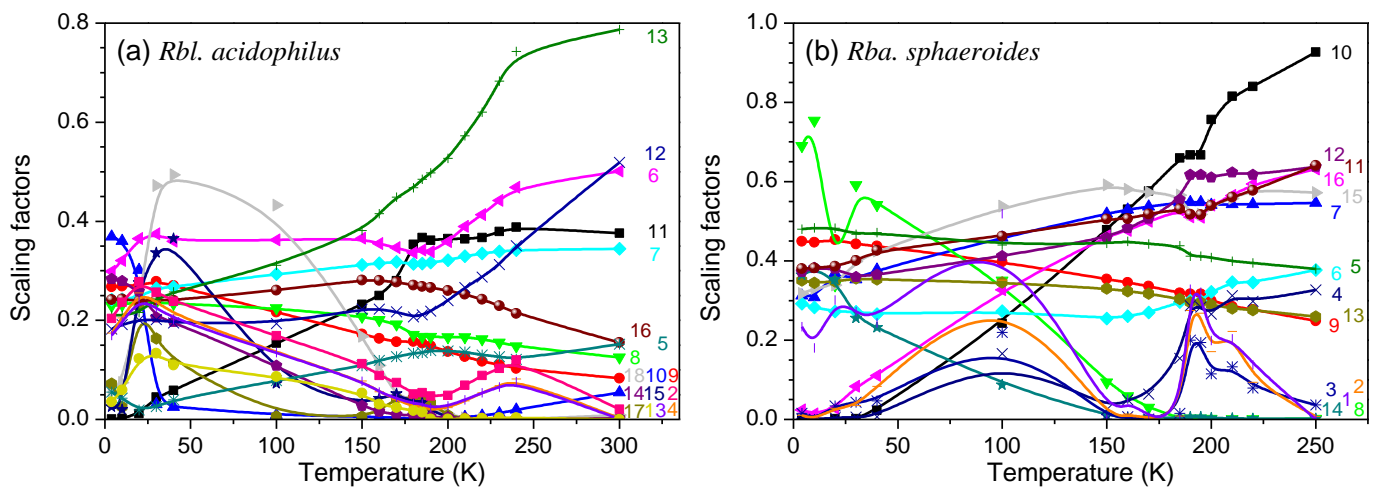

**Fig. S2.** Graphical presentation of the **D** matrix columns. (a) Temperature dependence ( $n = 18$  points) of the weighting vectors of  $p$  ( $p = 18$ ) “pure” spectral components of LH2 absorption spectrum for *Rbl. Acidophilus*. (b) Temperature dependence ( $n = 16$  points) of the weighting vectors of  $p$  ( $p = 16$ ) “pure” spectral components of LH2 absorption spectrum for *Rba. shpaeroides*. Different colors correspond to various spectral components shown in Fig. S1.
